# Supplementary material for: A green route to methyl acrylate and acrylic acid by an aldol condensation reaction over H-ZSM-35 zeolite catalysts
Source: Royal Society of Chemistry journal article supplement (doi:10.1039/c7cc04574c), 2017-01-01
Supplement: c7cc04574c1.pdf [file c7cc04574c1.pdf]

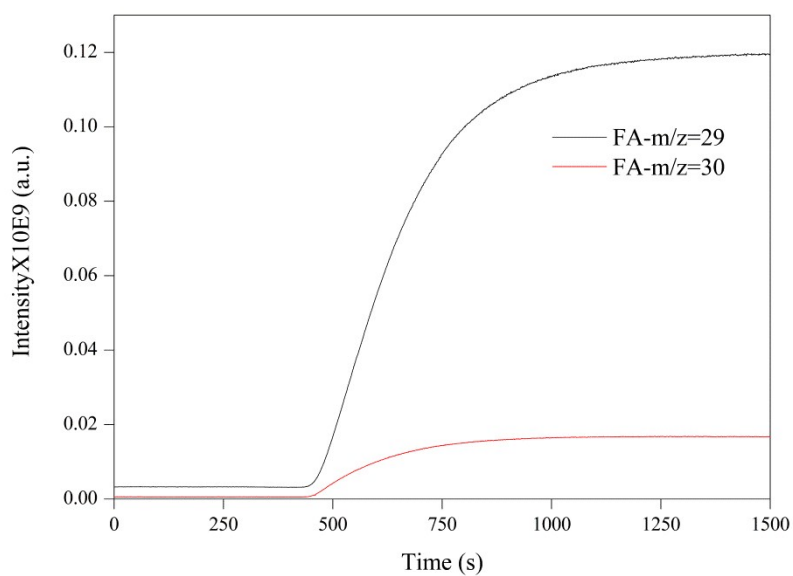

Figure S1 Mass signal of formaldehyde (FA) with two fragments during DMM exposure to HZSM-35 zeolite at high reaction temperature

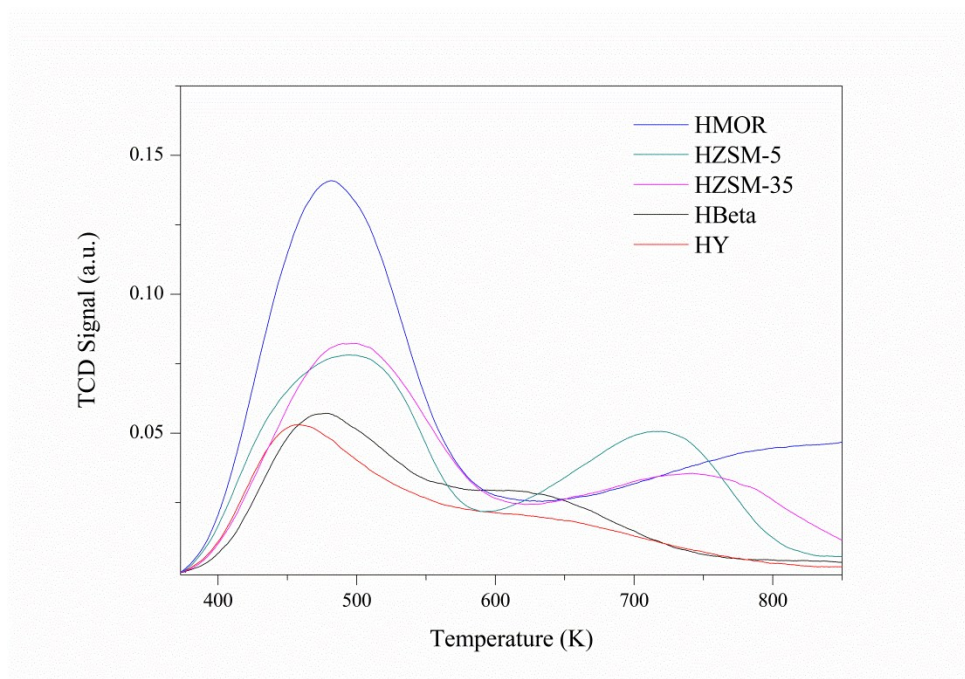

Figure S2  $\text{NH}_3$ -TPD characterizations of various zeolites (all the zeolite have the same mass 0.2 g)

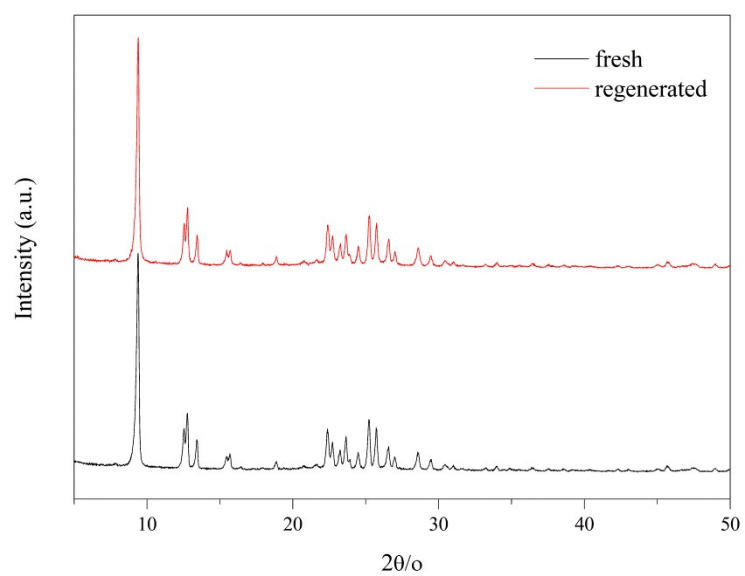

Figure S3 XRD curves of fresh HZSM-35 zeolite and the regenerated one
